# Supplementary material for: Predicting postoperative cognitive dysfunction in older cardiac surgery patients: An integrated machine learning approach with a visual nomogram
Source: Research Square preprint supplement (doi:10.21203/rs.3.rs-6007903/v1), 2025-02-27
Supplement: Supplementary file 1 [file 19d8aa45f36db044091fa5d2.docx]

**Appendix S1 The remaining baseline characteristics of the study cohort**

| **Variables** | **Total (n = 353)** M [P25, P75]/n  (%) | **No (n = 177)** M [P25, P75]/n (%) | **Yes (n = 176)**  M [P25, P75]/n(%) | ***p*** |
| --- | --- | --- | --- | --- |
| **Sex** |  |  |  | 0.999 |
| Male | 239 (67.71) | 120 (67.8) | 119 (67.61) |  |
| female | 114 (32.29) | 57 (32.2) | 57 (32.39) |  |
| **Age** |  |  |  | 0.505 |
| <65 | 130 (36.83) | 66 (37.29) | 64 (36.36) |  |
| 65-74 | 180 (50.99) | 93 (52.54) | 87 (49.43) |  |
| ≥75 | 43 (12.18) | 18 (10.17) | 25 (14.2) |  |
| **Education level** |  |  |  | 0.930 |
| illiterate and primary school | 199 (56.37) | 102 (57.63) | 97 (55.11) |  |
| junior high school | 87 (24.65) | 41 (23.16) | 46 (26.14) |  |
| high school | 40 (11.33) | 20 (11.3) | 20 (11.36) |  |
| college and above | 27 (7.65) | 14 (7.91) | 13 (7.39) |  |
| **Nutritional method** |  |  |  | 0.322 |
| Self-feeding | 317 (89.8) | 162 (91.53) | 155 (88.07) |  |
| Enteral | 28 (7.93) | 13 (7.34) | 15 (8.52) |  |
| Enteral and self-feeding | 8 (2.27) | 2 (1.13) | 6 (3.41) |  |
| **Whether delirium occurs** |  |  |  | < 0.001 |
| No | 316 (89.52) | 169 (95.48) | 147 (83.52) |  |
| Yes | 37 (10.48) | 8 (4.52) | 29 (16.48) |  |
| **Sedation after extubation** |  |  |  | 0.004 |
| No | 287 (81.3) | 155 (87.57) | 132 (75) |  |
| Yes | 66 (18.7) | 22 (12.43) | 44 (25) |  |
| **Whether to use analgesics** |  |  |  | 0.146 |
| No | 76 (21.53) | 32 (18.08) | 44 (25) |  |
| Yes | 277 (78.47) | 145 (81.92) | 132 (75) |  |
| **Whether pulmonary complications have occurred** |  |  |  | 0.605 |
| No | 338 (95.75) | 168 (94.92) | 170 (96.59) |  |
| Yes | 15 (4.25) | 9 (5.08) | 6 (3.41) |  |
| **Whether to intubate again** |  |  |  | 0.371 |
| No | 349 (98.87) | 176 (99.44) | 173 (98.3) |  |
| Yes | 4 (1.13) | 1 (0.56) | 3 (1.7) |  |
| **Surgical method** |  |  |  | 0.185 |
| Coronary Artery Bypass Grafting | 55 (15.58) | 32 (18.08) | 23 (13.07) |  |
| Valve replacement | 238 (67.42) | 115 (64.97) | 123 (69.89) |  |
| Aortic dissection | 15 (4.25) | 6 (3.39) | 9 (5.11) |  |
| Others (cardiac tumor resection, pericardial stripping, atrioventricular septal repair, etc.) | 24 (6.8) | 16 (9.04) | 8 (4.55) |  |
| Combination of 2 heart surgeries | 21 (5.95) | 8 (4.52) | 13 (7.39) |  |
| **Underlying comorbidities** |  |  |  | 0.095 |
| None | 40 (11.33) | 26 (14.69) | 14 (7.95) |  |
| hypertension | 108 (30.59) | 47 (26.55) | 61 (34.66) |  |
| diabetes | 21 (5.95) | 11 (6.21) | 10 (5.68) |  |
| Cerebral infarction | 10 (2.83) | 7 (3.95) | 3 (1.7) |  |
| other | 133 (37.68) | 70 (39.55) | 63 (35.8) |  |
| Mixed multiple | 41 (11.61) | 16 (9.04) | 25 (14.2) |  |
| **Heart function classification** |  |  |  | 0.028 |
| I | 10 (2.83) | 3 (1.69) | 7 (3.98) |  |
| II | 203 (57.51) | 103 (58.19) | 100 (56.82) |  |
| III | 127 (35.98) | 69 (38.98) | 58 (32.95) |  |
| IV | 13 (3.68) | 2 (1.13) | 11 (6.25) |  |
| **BMI(kg/m2)** |  |  |  | 0.675 |
| <18.5 | 19 (5.38) | 7 (3.95) | 12 (6.82) |  |
| 18.5-23.9 | 174 (49.29) | 89 (50.28) | 85 (48.3) |  |
| 24-27.9 | 128 (36.26) | 64 (36.16) | 64 (36.36) |  |
| ≥28 | 32 (9.07) | 17 (9.6) | 15 (8.52) |  |
| **LVEF** | 62 [58, 68] | 64 [59, 68] | 61.25 [57, 67] | 0.126 |
| **Albumin（g/L）** | 41.2 [36.7, 44.6] | 41.7 [35.5, 44.8] | 40.9 [37.9, 43.62] | 0.889 |
| **ALT（U/L）** | 18 [13, 26] | 18 [13, 26] | 18 [13, 27] | 0.707 |
| **Total bilirubin（μmmol/L）** | 13.1 [9.3, 19.2] | 13.8 [10.5, 19.6] | 12.45 [8.7, 18.33] | 0.087 |
| **Creatinine（μmmol/L）** | 80 [68, 93] | 81 [68, 92] | 79 [68, 93] | 0.848 |
| **Operation time（min）** | 235 [194, 296] | 249 [194, 299] | 226 [193, 294] | 0.283 |
| **Surgical diversion time（min）** | 108 [72, 150] | 107 [70, 145] | 111.5 [72, 157.25] | 0.349 |
| **Intraoperative blood loss（ml）** | 300 [200, 500] | 300 [200, 400] | 300 [250, 500] | 0.002 |
| **Highest temperature during ICU stay** | 38.2 [37.8, 38.5] | 38.1 [37.8, 38.5] | 38.2 [37.9, 38.5] | 0.134 |
| **Mechanical ventilation time（d）** | 0.81 [0.63, 0.95] | 0.81 [0.62, 0.92] | 0.81 [0.65, 0.95] | 0.170 |
| **Early activity time（min）** | 30 [15, 50] | 30 [20, 60] | 30 [13.75, 50] | 0.403 |
| **Worst sleep score during ICU stay** | 66 [50, 76] | 70 [55, 80] | 60 [40, 70] | < 0.001 |
| **APACHE Ⅱ** | 12 [9, 16] | 12 [9, 15] | 14 [10, 16.25] | < 0.001 |
| **ICU stay（d）** | 3 [3, 5] | 3 [3, 4] | 4 [3, 5] | 0.012 |
| **Postextubation oxygenation index** | 299 [244, 375] | 312 [249, 387] | 292.5 [240, 367] | 0.130 |
| **NRS pain score** |  |  |  | 0.999 |
| 0 | 208 (58.92) | 103 (58.19) | 105 (59.66) |  |
| 1 | 80 (22.66) | 40 (22.6) | 40 (22.73) |  |
| 2 | 47 (13.31) | 24 (13.56) | 23 (13.07) |  |
| 3 | 10 (2.83) | 5 (2.82) | 5 (2.84) |  |
| 4 | 5 (1.42) | 3 (1.69) | 2 (1.14) |  |
| 5 | 3 (0.85) | 2 (1.13) | 1 (0.57) |  |
| **Highest blood glucose levels（mmol/L）** | 12.9 [11, 15.2] | 12.5 [10.9, 14.5] | 13.75 [11.2, 16.2] | 0.005 |
| **Lowest blood glucose levels（mmol/L）** | 5.9 [5.2, 6.6] | 5.8 [5.4, 6.5] | 5.9 [5.1, 6.8] | 0.893 |
| **Total hospitalization duration（d）** | 13 [10, 17] | 12 [10, 16] | 14 [11, 18] | 0.021 |
| **Total hospitalization cost（yuan）** | 102515 [86095, 132581] | 97504 [81136, 119752] | 112531 [91926.5, 147838.25] | < 0.001 |
| **Self-care ability score** | 80 [65, 85] | 80 [75, 85] | 75 [55, 80] | < 0.001 |

Abbreviations: BMI, Body Mass Index; LVEF, left ventricular ejection fraction; APACHE,acute physiology and chronic health evaluation; NRS, Numeric Rating Scale; ICU, intensive care unit; n, number; M
