# Supplementary material for: Predicting postoperative cognitive dysfunction in older cardiac surgery patients: An integrated machine learning approach with a visual nomogram
Source: Research Square preprint supplement (doi:10.21203/rs.3.rs-6007903/v1), 2025-02-27
Supplement: Supplementary file 2 [file 6856585e1c29eb257f2b9f63.docx]

**Appendix S2 Table of incorporated variable definitions**

| **Variables** | **Specific definitions** |
| --- | --- |
| **Sex** | Male or female |
| **Age** | Based on actual date of birth |
| **Education** | Illiterate and primary school, junior high school, high school, college and above |
| **Nutritional approach** | Self-feeding，Enteral，Enteral and self-feeding |
| **Whether delirium occurs** | Confusion Assessment Method for the Intensive Care Unit（CAM-ICU） |
| **Whether sedation after extubation** | Were sedatives used after extubation? |
| **Whether to use analgesics** | Did you use analgesics after the endotracheal tube was removed? |
| **Whether pulmonary complications have occurred** | Did you have any pulmonary complications during your stay in the ICU? |
| **Whether to intubate again** | Was the endotracheal tube reinserted during the ICU stay? |
| **Surgical method** | Coronary Artery Bypass Grafting，Valve replacement，Aortic dissection，Others (cardiac tumor resection, pericardial stripping, atrioventricular septal repair, etc.)，Combination of 2 heart surgeries |
| **Underlying comorbidities** | None，hypertension，diabetes，Cerebral infarction，other，Mixed multiple |
| **Heart function classification** | NYHA心功能Ⅰ～Ⅳ分级 |
| **BMI** | Weight on admission (kg)/square of height (m2) |
| **LVEF** | left ventricular ejection fraction |
| **Albumin（g/L）** | The laboratory index was collected on the first day after surgery |
| **ALT（U/L）** | The laboratory index was collected on the first day after surgery |
| **Total bilirubin（μmmol/L）** | The laboratory index was collected on the first day after surgery |
| **Creatinine（μmmol/L）** | The laboratory index was collected on the first day after surgery |
| **Operation time（min）** | Duration of surgery |
| **Surgical diversion time（min）** | Extracorporeal circulation time |
| **Intraoperative blood loss（ml）** | Amount of blood loss during surgery |
| **Highest temperature during ICU stay** | Maximum temperature during ICU stay |
| **Mechanical ventilation time（d）** | Duration of mechanical ventilation in the ICU |
| **Early activity time（min）** | Duration of activity in the ICU |
| **Worst sleep score during ICU stay** | Worst sleep during ICU stay, using the Richards-Campbell Sleep Questionnaire |
| **APACHE Ⅱ** | Acute physical and chronic health score, The value of the first day after admission to the ICU |
| **ICU stay（d）** | Length of stay in the ICU |
| **Postextubation oxygenation index** | Oxygenation index half an hour after extubation |
| **NRS pain score** | NRS pain score half an hour after extubation |
| **Maximum blood**  **glucose level（mmol/L）** | Highest blood glucose level during ICU stay |
| **Lowest blood**  **glucose level（mmol/L）** | Lowest blood glucose level during ICU stay |
| **Total length of hospital stay（d）** | Length of hospital stay for this surgery |
| **Hospitalization expenses（yuan）** | The total cost of this surgery |
| **Self-care ability score** | Activity of daily living scale 3 days after discharge from ICU |
